# Supplementary material for: OXA-48 Carbapenemase-Producing Enterobacterales in Spanish Hospitals: An Updated Comprehensive Review on a Rising Antimicrobial Resistance
Source: PubMed Central journal article supplement (PMC7832331; doi:10.3390/antibiotics10010089), 2021-01-18
Supplement: antibiotics-10-00089-s001.pdf [file antibiotics-10-00089-s001.pdf]

**Table S1.** OXA-48-like enzymes reported to date.

| <b>Enzyme</b> | <b>First identification</b> | <b>Reference</b> |
|---------------|-----------------------------|------------------|
| OXA-48        | Turkey, 2001                | [17]             |
| OXA-54        | France, 2003                | [18]             |
| OXA-162       | Turkey, 2012                | [19]             |
| OXA-163       | Argentina, 2008             | [20]             |
| OXA-181       | India/Oman, 2010            | [21]             |
| OXA-199       | China, 2012                 | [22]             |
| OXA-204       | Tunisia/France, 2012        | [23]             |
| OXA-232       | India/France, 2011          | [24]             |
| OXA-244       | Spain, 2012                 | [25]             |
| OXA-245       | Spain, 2012                 | [25]             |
| OXA-247       | Argentina, 2010             | [26]             |
| OXA-252       | Canada, 2014                | [27]             |
| OXA-370       | Brazil, 2013                | [28]             |
| OXA-405       | France, 2014                | [29]             |
| OXA-416       | Italy, 2013                 | [30]             |
| OXA-436       | Denmark, 2015               | [31]             |
| OXA-438       | Argentina, 2020             | [32]             |
| OXA-439       | Argentina, 2015             | [38]             |
| OXA-484       | United Kingdom, 2015        | [33]             |
| OXA-505       | Spain, 2016                 | [38]             |
| OXA-514       | Indonesia, 2016             | [38]             |
| OXA-515       | Netherlands, 2016           | [38]             |
| OXA-517       | France, 2016                | [38]             |
| OXA-519       | Belgium, 2017               | [35]             |
| OXA-535       | France, 2018                | [36]             |
| OXA-538       | Algeria, 2016               | [38]             |
| OXA-546       | Portugal, 2017              | [38]             |
| OXA-547       | France, 2017                | [38]             |
| OXA-566       | New Zealand, 2017           | [37]             |
| OXA-567       | Argentina, 2017             | [38]             |
| OXA-731       | Japan, 2018                 | [38]             |
| OXA-788       | Argentina, 2019             | [38]             |
| OXA-793       | France, 2019                | [38]             |
| OXA-833       | India, 2019                 | [38]             |
| OXA-894       | China, 2019                 | [38]             |
| OXA-D20*      | Indonesia, 2018             | [38]             |
| OXA-D22*      | Netherlands, 2016           | [38]             |
| OXA-D281*     | USA, 2006                   | [38]             |
| OXA-D282*     | USA, 2006                   | [38]             |
| OXA-D283*     | USA, 2006                   | [38]             |
| OXA-D284*     | China, 2013                 | [38]             |
| OXA-D285*     | Netherlands, 2016           | [38]             |
| OXA-D287*     | Portugal, 2014              | [38]             |
| OXA-D288*     | Portugal, 2014              | [38]             |
| OXA-D289*     | Portugal, 2014              | [38]             |
| OXA-D290*     | Portugal, 2014              | [38]             |
| OXA-D291*     | Portugal, 2014              | [38]             |

---

|           |                   |      |
|-----------|-------------------|------|
| OXA-D292* | Portugal, 2014    | [38] |
| OXA-D293* | Portugal, 2014    | [38] |
| OXA-D294* | Portugal, 2014    | [38] |
| OXA-D295* | Portugal, 2014    | [38] |
| OXA-D296* | Portugal, 2014    | [38] |
| OXA-D297* | Portugal, 2014    | [38] |
| OXA-D298* | Portugal, 2014    | [38] |
| OXA-D299* | Portugal, 2014    | [38] |
| OXA-D300* | Portugal, 2014    | [38] |
| OXA-D301* | Portugal, 2014    | [38] |
| OXA-D302* | Portugal, 2014    | [38] |
| OXA-D303* | Portugal, 2014    | [38] |
| OXA-D304* | Portugal, 2014    | [38] |
| OXA-D305* | Portugal, 2014    | [38] |
| OXA-D306* | China, 2014       | [38] |
| OXA-D307* | Portugal, 2014    | [38] |
| OXA-D308* | Portugal, 2014    | [38] |
| OXA-D309* | Portugal, 2014    | [38] |
| OXA-D310* | Portugal, 2014    | [38] |
| OXA-D311* | Portugal, 2014    | [38] |
| OXA-D312* | Portugal, 2014    | [38] |
| OXA-D313* | Portugal, 2014    | [38] |
| OXA-D314* | Portugal, 2014    | [38] |
| OXA-D315* | Portugal, 2014    | [38] |
| OXA-D316* | Portugal, 2014    | [38] |
| OXA-D317* | Netherlands, 2016 | [38] |
| OXA-D318* | Portugal, 2014    | [38] |
| OXA-D319* | Portugal, 2014    | [38] |
| OXA-D320* | Portugal, 2014    | [38] |
| OXA-D322* | Portugal, 2014    | [38] |
| OXA-D323* | Portugal, 2014    | [38] |
| OXA-D324* | Portugal, 2014    | [38] |
| OXA-D326* | Netherlands, 2016 | [38] |
| OXA-D327* | Portugal, 2014    | [38] |
| OXA-D328* | Portugal, 2014    | [38] |
| OXA-D329* | Portugal, 2014    | [38] |
| OXA-D330* | Portugal, 2014    | [38] |
| OXA-D331* | Portugal, 2014    | [38] |
| OXA-D332* | Portugal, 2014    | [38] |
| OXA-D333* | Portugal, 2014    | [38] |
| OXA-D334* | Portugal, 2014    | [38] |
| OXA-D335* | Netherlands, 2016 | [38] |
| OXA-D336* | Portugal, 2014    | [38] |
| OXA-D337* | Portugal, 2014    | [38] |
| OXA-D338* | Portugal, 2014    | [38] |
| OXA-D339* | Portugal, 2014    | [38] |
| OXA-D340* | Portugal, 2014    | [38] |
| OXA-D855* | USA, 2007         | [38] |
| OXA-D856* | USA, 2007         | [38] |

---

Adapted from the information provided by Mairi et al. [12] and the Beta-Lactamase Database [38], updated in December 2020 (available online: <http://www.bldb.eu/BLDB.php?prot=D#OXA>). \* Denotes a

temporary name in the database, while waiting for a definitive assignment by the National Center for Biotechnology Information (NCBI).
